# Supplementary material for: A search for radical intermediates in the photocycle of LOV domains
Source: Royal Society of Chemistry journal article supplement (doi:10.1039/c4pp00155a), 2014-10-17

# Electronic supplementary Information

---

## A search for radical intermediates in the photocycle of LOV domains

Roger-Jan Kutta, Kathrin Magerl, Uwe Kensy, and Bernhard Dick  
Institut für Physikalische und Theoretische Chemie,  
Universität Regensburg  
93053 Regensburg

The file contains – for each of the 5 LOV domains studied (LOV1-wt, LOV2-wt, LOV1-C57S, LOV1-C57G, LOV2-C250S) the following supplementary information:

- a) Every data matrix **A** was analyzed by singular value decomposition (SVD). This yields a new representation of the form

$$A = \sum_{j=1}^N u_j s_j v_j$$

where the  $u_j$  are column vectors, the  $v_j$  are row vectors,  $N$  is the rank of the matrix, and the  $s_j$  are positive numbers in decreasing order. The approximations of the matrix are calculated with  $K = 1, 2, \dots$  according to

$$A^{(K)} = \sum_{j=1}^K u_j s_j v_j$$

For each approximation a standard deviation  $\sigma(K)$  is calculated as the root mean square deviation between  $A^{(K)}$  and the original matrix. The plot of  $\sigma(K)$  vs.  $K$  decreases and will reach zero at  $K=N$ . Inspection of this “residual variance”-plot shows, how many components  $K$  are needed to represent the significant part of the data, i.e., the first value of  $K$  that does not yield a substantial improvement of the standard deviation, and all following components, only contribute to the noise. The fit of the time functions is then made to those  $K$  vectors  $u_j$ .

- b) For each of the vectors  $u_j$  ( $j=1..K$ ) considered in the fit, we show this vector, the fit, and the difference of both. The x-axis has 512 steps and corresponds to the time axis of the experiment. This allows a good visual inspection of the quality of the fit, much better than showing the difference of the two matrices (data minus fit) as a false color representation.

## Fit to LOV1-wt (5 $\mu$ s)

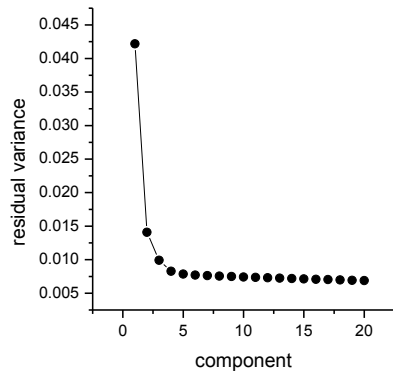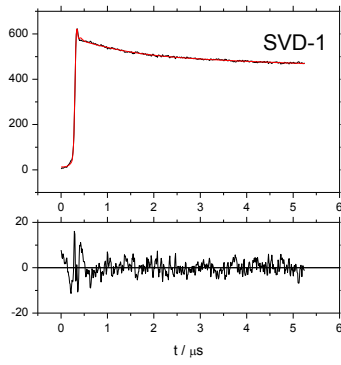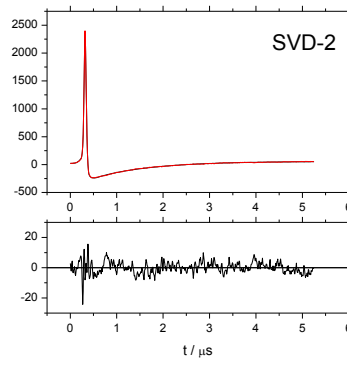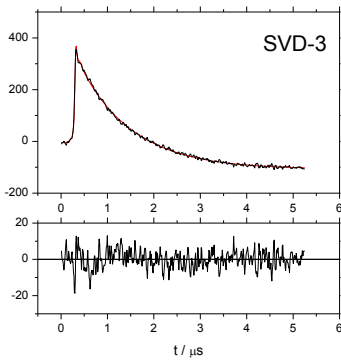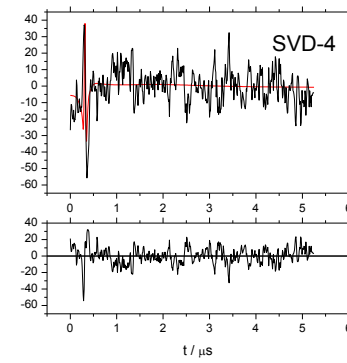

# LOV1-C57S mutant (100 $\mu$ s)

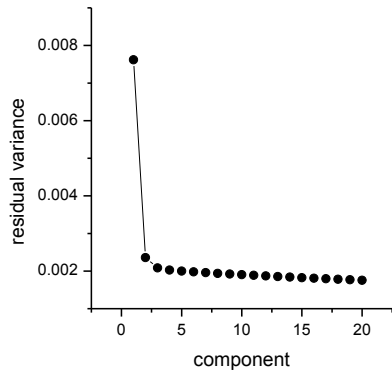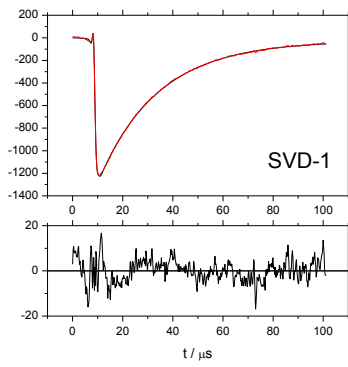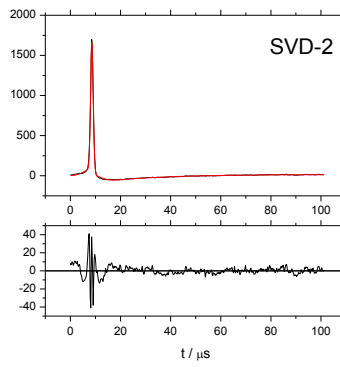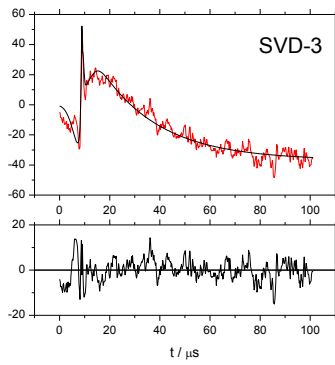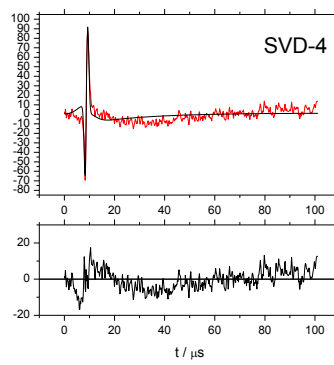

## LOV2-C250S mutant (500 $\mu$ s)

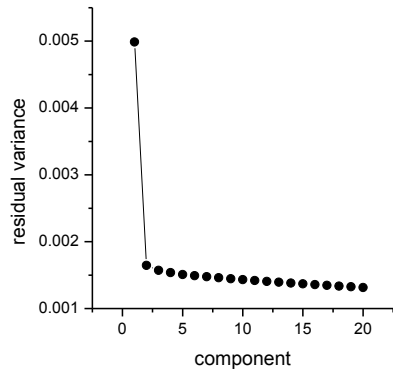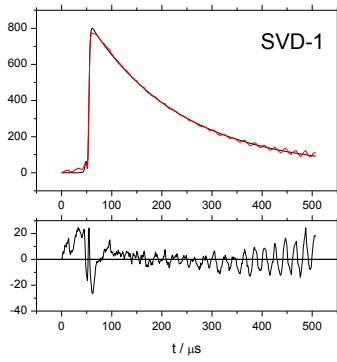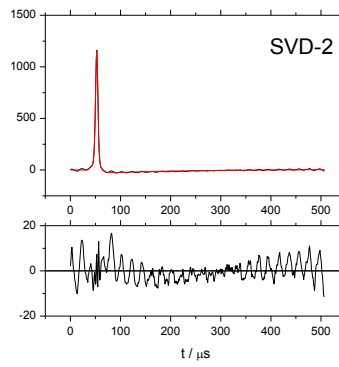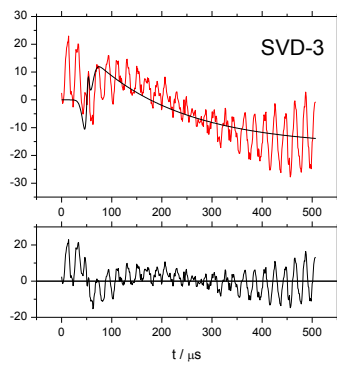

## LOV2 wt (2 $\mu$ s)

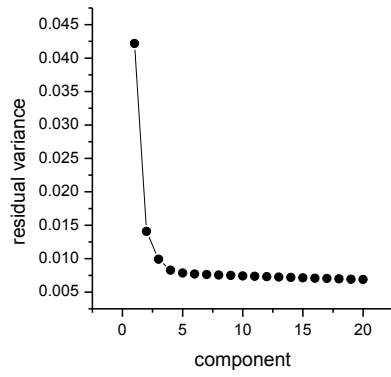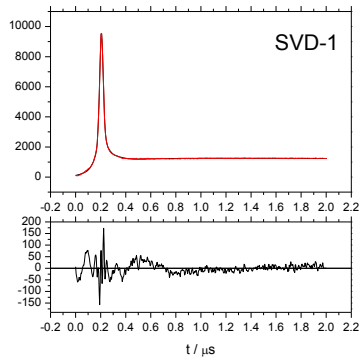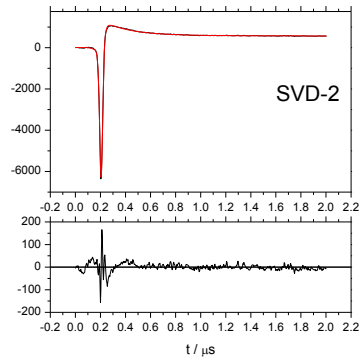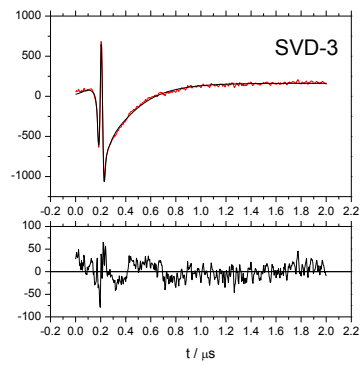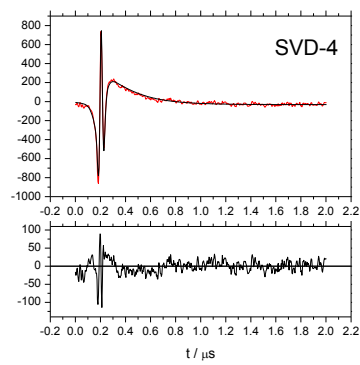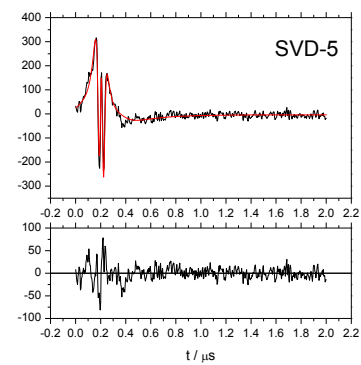

# LOV1 C57G 100 $\mu\text{s}$

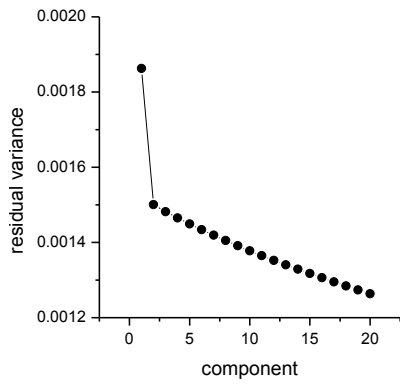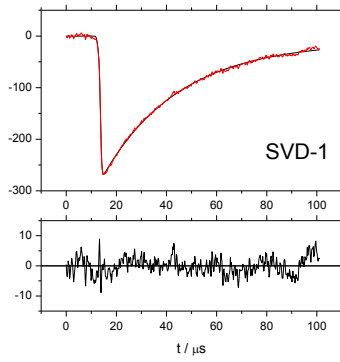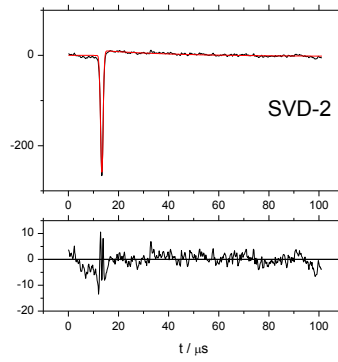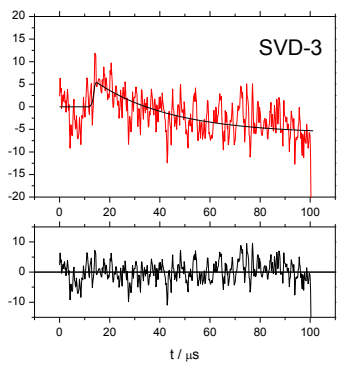

Supplement: c4pp00155a1.pdf [file c4pp00155a1.pdf]
